# Supplementary material for: Spatial analysis of tobacco outlet density on secondhand smoke exposure and asthma health among children in Baltimore City
Source: HighWire-hosted journal article supplement (doi:10.1136/tobaccocontrol-2021-056878), 2022-01-19
Supplement: tobaccocontrol-2021-056878supp001_data_supplement.pdf [file tobaccocontrol-2021-056878supp001_data_supplement.pdf]

| Characteristic         | Air Nicotine           |         | Serum Cotinine         |         | ATAQ                   |         | NAEPP             |         |
|------------------------|------------------------|---------|------------------------|---------|------------------------|---------|-------------------|---------|
|                        | $\hat{\beta}$ [95% CI] | p-value | $\hat{\beta}$ [95% CI] | p-value | $\hat{\beta}$ [95% CI] | p-value | OR [95% CI]       | p-value |
| Age                    | 0.01 [-0.13-0.14]      | 0.91    | 0.06 [-0.13-0.25]      | 0.54    | -0.04 [-0.16-0.09]     | 0.58    | 1.09 [0.95-1.24]  | 0.22    |
| Race                   |                        |         |                        |         |                        |         |                   |         |
| White/Other            | -----                  | ----    | -----                  | ----    | -----                  | ----    | -----             | ----    |
| Black                  | 0.63 [-0.25-1.51]      | 0.16    | 0.91 [-0.37-2.19]      | 0.16    | -0.15 [-1.05-0.74]     | 0.73    | 4.55 [1.67-12.36] | <0.01   |
| Sex                    |                        |         |                        |         |                        |         |                   |         |
| Male                   | -----                  | ----    | -----                  | ----    | -----                  | ----    | -----             | ----    |
| Female                 | 0.15 [-0.53-0.71]      | 0.65    | -0.30 [-1.17-0.56]     | 0.48    | -0.27 [-0.90-0.36]     | 0.39    | 1.27 [0.67-2.41]  | 0.47    |
| Caregiver Education    |                        |         |                        |         |                        |         |                   |         |
| Less than college      | -----                  | ----    | -----                  | ----    | -----                  | ----    | -----             | ----    |
| Some college/beyond    | -1.23 [-1.81- -0.66]   | <0.01   | -1.53 [-2.26- -0.80]   | <0.01   | 0.51 [-0.10-1.13]      | 0.10    | 0.96 [0.51-1.80]  | 0.89    |
| Health Insurance       |                        |         |                        |         |                        |         |                   |         |
| Private                | -----                  | ----    | -----                  | ----    | -----                  | ----    | -----             | ----    |
| Public                 | 1.13 [0.34-1.92]       | <0.01   | 0.62 [-0.60-1.83]      | 0.31    | 0.29 [-0.53-1.10]      | 0.49    | 1.63 [0.71-3.73]  | 0.25    |
| Caregiver Income       |                        |         |                        |         |                        |         |                   |         |
| < \$20, 000            | -----                  | ----    | -----                  | ----    | -----                  | ----    | -----             | ----    |
| \$20,000 - \$39,999    | -0.45 [-1.15-0.26]     | 0.21    | 0.22 [-0.73-1.17]      | 0.64    | 0.37 [-0.38-1.12]      | 0.33    | 0.75 [0.34-1.65]  | 0.48    |
| \$40,000               | -1.52 [-2.32- -0.73]   | <0.01   | -1.09 [-2.23-0.04]     | 0.06    | -0.43 [-1.27-0.41]     | 0.31    | 0.42 [0.17-1.01]  | 0.05    |
| Household Occupancy    | 0.14 [-0.03-0.32]      | 0.10    | 0.21 [-0.22-0.27]      | 0.86    | 0.03 [-0.15-0.20]      | 0.77    | 0.96 [0.81-1.15]  | 0.67    |
| Smokers in Home        |                        |         |                        |         |                        |         |                   |         |
| No                     | -----                  | ----    | -----                  | ----    | -----                  | ----    | -----             | ----    |
| Yes                    | 1.76 [1.21-2.31]       | <0.01   | 1.67 [0.94-2.41]       | <0.01   | 0.40 [-0.22-1.02]      | 0.20    | 1.96 [1.03-3.73]  | 0.04    |
| Type of Dwelling       |                        |         |                        |         |                        |         |                   |         |
| Detached/Semi-detached | -----                  | ----    | -----                  | ----    | -----                  | ----    | -----             | ----    |
| Row-home/Town-home/Apt | 0.84 [0.06-1.62]       | 0.03    | 0.83 [-0.38-2.03]      | 0.17    | 0.27 [-0.53-1.08]      | 0.50    | 3.25 [1.40-7.56]  | <0.01   |
| Tobacco Outlet Density | 0.03 [0.00-0.06]       | 0.04    | 0.03 [-0.02-0.07]      | 0.23    | 0.01 [-0.02-0.04]      | 0.58    | 1.01 [0.98-1.05]  | 0.40    |
